# Supplementary material for: Fusing Accelerometry with Videography to Monitor the Effect of Fatigue on Punching Performance in Elite Boxers
Source: MDPI journal article supplement (doi:10.3390/s20205749), 2020-10-10
Supplement: s1 [file s1]

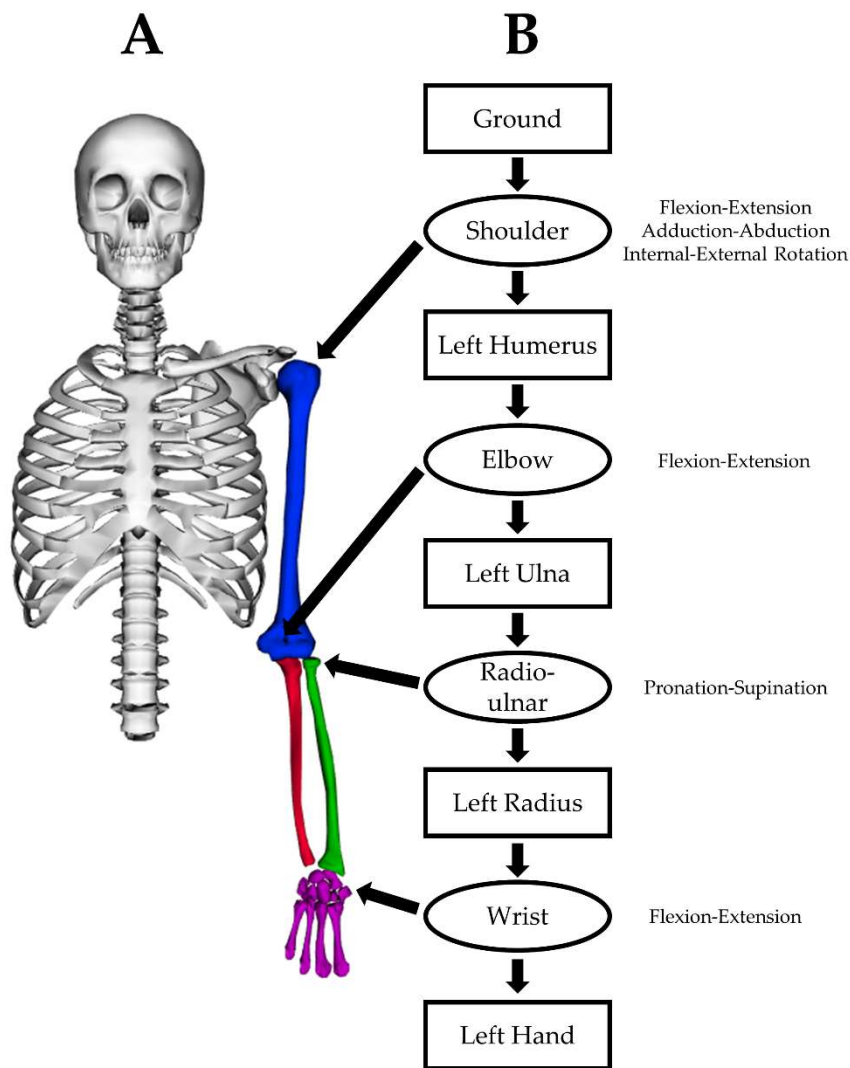

**Supplementary Figure S1.** (A) Image of three-dimensional model (torso and head geometry is purely for visualization purposes). (B) Model topology (rectangles: rigid segments; ellipses: joints with permissible degrees-of-freedom).
